# An Integrated Approach to Rapid Diagnosis of Tuberculosis and Multidrug Resistance Using Liquid Culture and Molecular Methods in Russia

Yanina Balabanova<sup>1,2\*</sup>, Francis Drobniowski<sup>1</sup>, Vladyslav Nikolayevskyy<sup>1</sup>, Annika Kruuner<sup>1</sup>, Nadezhda Malomanova<sup>2</sup>, Tatyana Simak<sup>2</sup>, Nailya Ilyina<sup>2</sup>, Svetlana Zakharova<sup>3</sup>, Natalya Lebedeva<sup>3</sup>, Heather L. Alexander<sup>4,5</sup>, Rick O'Brien<sup>4</sup>, Hojoon Sohn<sup>4</sup>, Anastasia Shakhmistova<sup>2</sup>, Ivan Fedorin<sup>2</sup>

**1** National Mycobacterium Reference Laboratory, Institute of Cell and Molecular Sciences, Queen Mary College, Barts and the London School of Medicine, University of London, London, United Kingdom, **2** Samara Oblast Tuberculosis Dispensary, Samara, Russia, **3** Samara City Tuberculosis Service, Samara, Russia, **4** Foundation for Innovative New Diagnostic, Cointrin/Geneva, Switzerland, **5** US Centers for Disease Control and Prevention, Division of TB Elimination, Atlanta, Georgia, United States of America

## Abstract

**Objective:** To analyse the feasibility, cost and performance of rapid tuberculosis (TB) molecular and culture systems, in a high multidrug-resistant TB (MDR TB) middle-income region (Samara, Russia) and provide evidence for WHO policy change.

**Methods:** Performance and cost evaluation was conducted to compare the BACTEC™ MGIT™ 960 system for culture and drug susceptibility testing (DST) and molecular systems for TB diagnosis, resistance to isoniazid and rifampin, and MDR TB identification compared to conventional Lowenstein-Jensen culture assays.

**Findings:** 698 consecutive patients (2487 sputum samples) with risk factors for drug-resistant tuberculosis were recruited. Overall *M. tuberculosis* complex culture positivity rates were 31.6% (787/2487) in MGIT and 27.1% (675/2487) in LJ (90.5% and 83.2% for smear-positive specimens). In total, 809 cultures of *M. tuberculosis* complex were isolated by any method. Median time to detection was 14 days for MGIT and 36 days for LJ (10 and 33 days for smear positive specimens) and indirect DST in MGIT took 9 days compared to 21 days on LJ. There was good concordance between DST on LJ and MGIT (96.8% for rifampin and 95.6% for isoniazid). Both molecular hybridization assay results correlated well with MGIT DST results, although molecular assays generally yielded higher rates of resistance (by approximately 3% for both isoniazid and rifampin).

**Conclusion:** With effective planning and logistics, the MGIT 960 and molecular based methodologies can be successfully introduced into a reference laboratory setting in a middle incidence country. High rates of MDR TB in the Russian Federation make the introduction of such assays particularly useful.

**Citation:** Balabanova Y, Drobniowski F, Nikolayevskyy V, Kruuner A, Malomanova N, et al. (2009) An Integrated Approach to Rapid Diagnosis of Tuberculosis and Multidrug Resistance Using Liquid Culture and Molecular Methods in Russia. PLoS ONE 4(9): e7129. doi:10.1371/journal.pone.0007129

**Editor:** Keertan Dheda, University of Cape Town, South Africa

**Received:** March 18, 2009; **Accepted:** August 24, 2009; **Published:** September 23, 2009

**Copyright:** © 2009 Balabanova et al. This is an open-access article distributed under the terms of the Creative Commons Attribution License, which permits unrestricted use, distribution, and reproduction in any medium, provided the original author and source are credited.

**Funding:** The work was jointly funded by Foundation of Innovative New Diagnostics (FIND), Queen Mary College, University of London and Hain Lifesciences GmbH, Nehren, Germany. Neither Becton Dickinson Diagnostic Systems nor Hain Lifesciences GmbH had a role in study design, data collection and analysis, decision to publish, or preparation of the manuscript.

**Competing Interests:** The authors have declared that no competing interests exist.

\* E-mail: y.balabanova@qmul.ac.uk

## Introduction

Tuberculosis (TB) remains one of the leading causes of morbidity and mortality globally, focused principally, but not exclusively, in the non-industrialized world.

Timely diagnosis and prompt treatment of infectious cases are the key elements of the international effort to combat TB, providing cure of an individual patient and reducing the spread of TB by rendering infectious cases non-infectious.

Multidrug-resistant TB (MDR TB), i.e. resistance to at least isoniazid (Inh) and rifampin (Rif), and extensively drug-resistant TB (XDR TB), i.e. MDR plus resistance to amikacin, kanamycin or capreomycin and a fluoroquinolone, are the most problematic

forms of resistance because treatment options are limited and the second-line drugs used for therapy are more toxic, less effective, more expensive, and must be administered for a longer period of time than standard first-line drug therapy [1].

The highest rates of MDR TB in the world (approximately 10% in new and 25% in re-treatment cases), have been reported from the Baltic region and countries of the former Soviet Union [2–11].

*Conventional culture and DST on solid media is a slow process, and in high income, low-incidence countries these systems have been supplemented (or replaced) by automated liquid culture systems such as the Becton Dickinson BACTEC™ MGIT™ 960 system. Decreased time to detection, greater sensitivity than Lowenstein-Jensen (LJ) solid media, comparable sensitivity to the radiometric Bactec 460 system in detecting Mycobacteria in clinical*

specimens, and good concordance with both LJ and Bactec 460 DST for first-line drugs (FLD) have been demonstrated in several studies [12–16].

Rapid molecular methods, including commercial or in-house DNA hybridisation or amplification methods [17] allow detection of TB and rifampin resistance (and, for some, assays isoniazid resistance as well) in clinical samples within 1–2 days [18–25]. Despite the demonstrated advantages, the limited data on the performance, role and value of rapid culture, DST and molecular detection systems, together with concerns of increased cost and contamination rates relative to conventional culture on solid media, have dampened interest and progress in implementing these systems in low to middle income settings. However, this situation is changing in response to the growing MDR TB epidemic and the recent WHO recommendations on the use of liquid culture and DST and line probe assays (LPAs) [26,27].

This study describes the feasibility of introduction, diagnostic accuracy and costs of the MGIT rapid culture system for primary specimens and FLD DST, coupled with rapid molecular systems for TB culture identification and detection of resistance to isoniazid and rifampin in Samara, Russia, a middle income region with a high burden of MDR TB [5,9,28]. The project was undertaken with the intention (achieved) of producing evidence for the implementation of global health policy changes relating to TB diagnosis by the WHO.

## Materials and Methods

### Ethics statement

The study was approved by the Samara Medical University Ethics Committee. The study received a waiver of informed consent because the study used samples that were routinely collected for use in approved routine tests on LJ media. The tests on the MGIT 960 system were performed in parallel with the approved routine tests on LJ media. All aspects related to culture and phenotypic DST were reviewed and approved by the U.S. Centers for Disease Control and Prevention as non-human subjects research which does not require informed consent.

### Setting and Design

A programmatic intervention and evaluation was conducted to compare the feasibility, utility and performance characteristics (recovery rates, time-to-detection) of the MGIT culture and DST system (Becton Dickinson, Sparks, MD) and rapid molecular systems to conventional standard reference LJ-based assays in patients at high risk of MDR TB in the central TB laboratory of Samara Region (Category 3 level facility), Russia Federation. The study was preceded by development of an agreed customer support plan that included installation and maintenance of the BACTEC™ machine as well as an uninterrupted supply of reagents needed based on reduced pricing policy offered for Samara. Principles outlined by the Standards for the Reporting of Diagnostic accuracy studies (STARD) for diagnostic accuracy studies were followed.

Prior to implementation into routine practice, MGIT and molecular methods were quality controlled and validated by the Health Protection Agency National Mycobacterium Reference Unit (HPA NMRL) according to the WHO/IUATLD Supranational Reference Laboratory (SRL) proficiency testing criteria [29] using a panel of defined *M. tuberculosis* cultures provided through the WHO SRL mechanism. Once the laboratory achieved pre-determined minimum standard efficiency levels based on WHO/IUATLD Supranational Reference Laboratory proficiency testing criteria for performance [29] of 80% (E and S), 89% (Inh), and 95% (Rif) in performing MGIT DST, MGIT and LJ culture and

FLD DST were performed in parallel and all results were made available to clinicians. All staff was formally trained in bacteriological and molecular methods. Staff performing molecular assays was blinded to culture results and both were blinded to epidemiological data. This study also evaluated the detailed costs associated with the introduction of MGIT for TB culture diagnosis and DST in comparison with conventional methods on solid LJ media.

### Patient Population

Patients were enrolled from 8 TB clinics in Samara Oblast that are part of a specialised service which provides diagnostics and treatment for TB patients only. The clinics verify the diagnosis for patients referred by the general health care sector after initial screening with a high suspicion for TB. All confirmed or suspected pulmonary TB patients who were sputum smear-positive and/or at high risk for MDR TB (individuals with prior TB treatment, persistent smear-positivity after 3 months treatment and/or poor clinical improvement, relapse, default, repeated treatment interruptions, contacts of patients with confirmed MDR TB, homeless persons and former prisoners) were included.

Patients were excluded if they were currently receiving TB treatment and smear-converted or remained smear-negative, were known to be infected with an MDR TB strain, or were suspected of having extra-pulmonary TB without pulmonary involvement.

Enrolment commenced in April 2006 and continued through April 2008.

### Specimen preparation and primary culture

At least three routine sputum samples were collected from each patient into 50 ml screw-cap centrifuge tubes (Falcon, Becton Dickinson, USA) prior to treatment initiation as well as during treatment as follow-up control samples. Sputum samples were sent daily from the clinics to the laboratory; specimens were stored at 4°C until processed.

Specimens were processed using the NaOH-NALC method [30] employing the Becton Dickinson MycoPrep™ kit as described by the manufacturer. The final concentration of NaOH (1.0% w/v) was determined during the validation phase to maintain contamination rates below 8–10%. Concentrated specimens were stained for the presence of acid-fast bacilli (AFB) according to the Ziehl-Nielsen method [31].

All processed specimens were immediately inoculated on both MGIT (0.5 ml inoculum) and LJ media (0.2 ml inoculum).

The MGIT 960 was checked daily for positive and negative cultures and LJ cultures were checked at least weekly. Although this standard approach carried an observation bias for time to detection of positive cultures, it followed the accepted practice of periodic visual scanning of LJ slopes reported in all previous published studies of the MGIT and comparable systems and LJ culture. Tubes flagged as positive by the MGIT 960 instrument were examined visually for potential mycobacterial growth and growth was inoculated onto a blood agar plate, subcultured on an LJ slant and MGIT for DST, and an AFB smear was prepared.

### Isolate identification

Cultures were identified as *M. tuberculosis* complex (MTC) according to colony morphology, microscopic appearance, and standard biochemical assays, as specified in the Russian Federal guidelines [31].

Molecular tests also were used to decrease the time to identification of MTC. Previous studies suggested that liquid culture systems would increase the isolation of non-tuberculous mycobacteria (NTM) as well as *M. tuberculosis* [32]. Therefore, 327

consecutive mycobacterial cultures initially isolated on the MGIT 960 system were identified to species level using the GenoType<sup>®</sup> CM assay (Hain Lifesciences GmbH, Nehren, Germany).

### First Line drug susceptibility (DST)

The drug concentrations used in the MGIT system were ( $\mu\text{g/ml}$ ): streptomycin (S): 1.0; isoniazid (Inh): 0.1; rifampin (Rif): 1.0; ethambutol (E): 5.0; pyrazinamide (Z): 100.0 [31,33]. DST on LJ was performed according to the absolute concentration method, utilizing the following drug concentrations ( $\mu\text{g/ml}$ ): S: 10.0; Inh: 1.0; Rif: 40.0; E: 2.0 [31]. Sensitivity to pyrazinamide is not routinely tested on LJ media according to Russian Federal guidelines [31].

As the majority of isolates were MTC (see Results), subsequent cultures were identified using an in-house macroarray, as described elsewhere [34] and/or a commercial “line probe” assay system for MTC identification and rifampin and isoniazid resistance (GenoType<sup>®</sup> MTBDR<sub>plus</sub>, Hain Lifesciences GmbH, Germany). Both systems employed the same basic principles i.e. polymerase chain reaction (PCR) amplification of relevant regions of genes including the *katG* and *rpoB* genes and *inhA* promoter region, followed by reverse phase hybridisation to probes immobilised on a solid phase membrane.

### Cost analysis

All laboratory procedures for both LJ and MGIT culture and DST were broken down into their component parts and a detailed time-and-motion study was conducted [35–37]. Total salaries, consumables costs, and capital (including equipment) infrastructure costs, maintenance, administrative and overhead costs of the laboratory, as well as transport costs were included in the final analysis.

Prices were converted into US dollars (USD) for this analysis. International pricings for all relevant laboratory resources and consumables for our study were based on published manufacturer suggested retail prices (MSRP) in developed countries such as the US. For local price analysis, procurement pricings specific to Samara with exceptions to MGIT instrumentation and consumables (for which we used the FIND-Becton Dickinson (BD) negotiated price available in 2006) were used. The usage of equipment, reagents, and laboratory space were quantified as

minute used per square meter of space and minutes used. Overhead costs were calculated and allocated based on time-observation data particular to building space and staff utilization for each laboratory procedures included in our cost analysis.

### Statistical analysis

All data were obtained from records collected by the clinical and laboratory staff and entered in a password protected stand-alone database to maintain confidentiality.

Statistical analysis was performed using the SPSS version 15 package (SPSS, <http://www.spss.com>). The difference between rates among different groups was assessed using chi-test ( $\chi^2$ ).

### Results

In total, 698 consecutive patients were recruited into the study and 2545 sputum samples were subjected to bacteriological examination on both LJ and MGIT media.

Initially, the MGIT 960 system yielded increased rates of culture contamination but rates were quickly lowered to 3.4% by meticulous adherence to the manufacturer’s manual and protocols, and with rapid transport and/or refrigeration of samples. The samples collected from patients were immediately refrigerated and stored at +4 for a maximum time of 48 hours prior to decontamination and culture. All samples from participating study sites were transported in cool bags. Sterility checks of water, buffer and NALC solutions and disposables consumables (such as washes from sputum containers, cryovials and laboratory tubes used) were regularly run using blood agar plates. Negative controls of each batch of MGIT tubes and daily logs of all ready-made solutions were used to monitor any potential manufacturer’s contamination. In order for any increased culture speed to be valuable, a rapid molecular identification method was essential to identify culture growth in 1 day; this also permitted TB identification in bacterially-contaminated cultures (data not shown). A proportion of cultures was also spoligotyped to exclude cross-contamination within the laboratory.

Of the first 327 consecutive patients with positive mycobacterial isolates, the applied GenoType<sup>®</sup> Mycobacterium CM assay demonstrated that the vast majority (96.6%) of isolates were *M.*

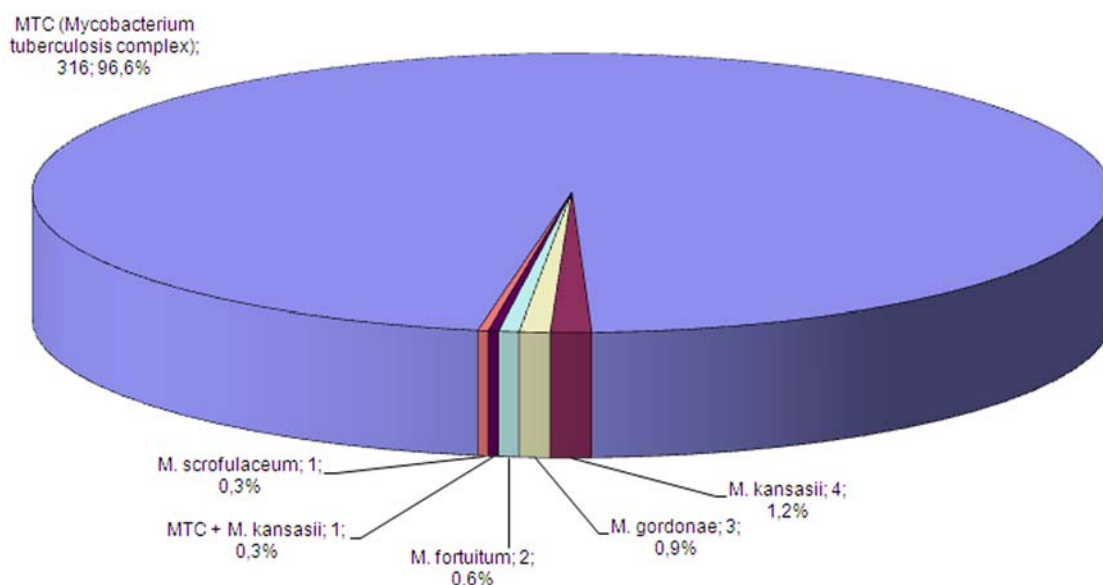

**Figure 1. Mycobacterial speciation of cultures isolated from sputum specimens.**

doi:10.1371/journal.pone.0007129.g001

**Table 1.** MGIT and LJ culture positive sputum specimens by microscopy result (MTC only)\*.

| Sputum smear status    | MGIT        |                     | LJ          |                     | Positive and contaminated |           |
|------------------------|-------------|---------------------|-------------|---------------------|---------------------------|-----------|
|                        | pos, n, (%) | Contaminated, n (%) | pos, n (%)  | Contaminated, n (%) | MGIT                      | LJ        |
| Smear positive(n=399)  | 361 (90.5%) | 4 (1.0%)            | 332 (83.2%) | 2 (0.5%)            | 0                         | 0         |
| Smear negative(n=2088) | 426 (20.4%) | 81 (3.9%)           | 343 (16.4%) | 8 (0.4%)            | 1 (0.05%)                 | 1 (0.05%) |
| Total (n=2487)         | 787 (31.6%) | 85 (3.4%)           | 675 (27.1%) | 10 (0.4%)           | 1 (0.04%)                 | 1 (0.04%) |

\*specimens for which both MGIT and LJ results available  
doi:10.1371/journal.pone.0007129.t001

tuberculosis complex (Figure 1). Subsequently, molecular methods were used to test all subsequent isolates simply for the presence or absence of MTC. Since very few NTMs were isolated, this paper presents results for MTC only. The overall MTC culture positivity rate for MGIT and LJ was 31.6% and 27.1% respectively ( $\chi^2=11.9$ ,  $p=0.001$ ); for smear positive specimens it was 90.5% and 83.2% ( $\chi^2=8.6$ ,  $p=0.003$ ) and for smear negative specimens, 20.4% and 16.4% respectively ( $\chi^2=10.7$ ,  $p=0.001$ ) (Table 1).

The overall proportion of the total MTC isolates (number confirmed positive cultures by MGIT or LJ/total number positive cultures by either method) which were positive by MGIT was 97.2% (786/809) compared to 81.1% (656/809) for LJ. Of all culture positive specimens, 99.2% of smear-positive and 95.5% of smear-negative specimens were positive by MGIT while LJ recovery rates were 90.9% for smear-positives and 73.2% for smear-negative specimens. The concordance of results between the two systems was high for isolating MTC (92.7%) (Table 2).

Among culture positives, the overall median time to detection of *M. tuberculosis* complex was 14 days and 36 days for MGIT and LJ, respectively. Indirect DST from isolates took an additional 9 days in MGIT and 21 days on LJ. Therefore, providing a rapid molecular identification method is available that takes 1–2 days to perform as in the case of the GenoType® MTBDR<sub>plus</sub> method and comparable methods such as in house *in situ* hybridisation methods [34,38] the overall turn-around time can be as short as 25 days for MGIT vs approximately 60 days for LJ (Figure 2).

Comparative phenotypic DST data for both methods (Table 3) on all bacteriologically confirmed TB strains demonstrate approximately 63%, 50%, 27%, 60%, and 10% of the patients were resistant to isoniazid, rifampin, ethambutol, streptomycin, and pyrazinamide, respectively. Approximately 50% of cultures were MDR TB and nearly all rifampin-resistant isolates (98.7% and 100% detected by LJ and MGIT, respectively) were MDR TB. There was good concordance between the results obtained by

the LJ and MGIT methods (Table 4) with agreement of 96.8% for rifampin, 95.6% for isoniazid but only 91.9% for ethambutol and for 89.5% for streptomycin.

The overall Inh, Rif and MDR resistance rates in the population as determined by the in-house macroarray (65.7%, 54.6% and 51.0% respectively) and the Hain methods (66.6%, 54.8% and 53.2% respectively) were comparable.

**There was good concordance for isoniazid and rifampin resistance between the commercial and in-house low-density array-based methods (88.5% and 80.7% for macroarray and 87.3% and 77.9% for Hain; 87.6% and 84.9% for macroarray and 84.4% and 82.2% for Hain respectively) compared with the MGIT culture or LJ systems. The sensitivity and specificity of both methods when compared to either culture system were high: almost 93% and 94% for detection of isoniazid and approximately 87% and 94% for detection of rifampin resistance against the MGIT system; approximately 92% and 93% for isoniazid and 90% and 93% for rifampin against the LJ system respectively (Tables 5–6).**

Compared to the LJ method, MGIT culture was consistently more expensive than LJ regardless of pricing levels but the difference was small (Table 7). However, the FIND-BD pricing agreement brings about a 40% reduction in overall costs for screening one specimen for full first line DST with MGIT at \$32 as compared to \$56 for full catalogue pricing. LJ methodology costs ranged from \$17 to \$20 in Samara and international prices; if only isoniazid and rifampin resistance was tested the equivalent costs for Samara and internationally were \$13 and \$15 for LJ and \$17 and \$28 for the MGIT system.

The cost of performing the in-house method (macroarray) in Samara was calculated based on local wages and overhead costs: the overall average unit cost of the macroarray test was at about \$15 per specimen. The total chemical and reagent components of

**Table 2.** Recovery rates of each method and concordance compared to all positive cultures (MTC only)\*.

| Micro-scopsy    | Recovery rates of each method compared to all positive cultures |                        |       |                      |       |               | Concordance of MGIT and LJ culture results |               |              |                |               |               |              |                |
|-----------------|-----------------------------------------------------------------|------------------------|-------|----------------------|-------|---------------|--------------------------------------------|---------------|--------------|----------------|---------------|---------------|--------------|----------------|
|                 | Total N positive cultures                                       | MGIT recovery rate (%) |       | LJ recovery rate (%) |       | $\chi^2, p$   | MGIT+ and LJ+                              | MGIT- and LJ- | N concordant | Concordant (%) | MGIT+ but LJ- | MGIT- but LJ+ | N discordant | Discordant (%) |
|                 |                                                                 | MGIT+                  | LJ+   | MGIT+                | LJ+   |               |                                            |               |              |                |               |               |              |                |
| formula         | $a = d+f+g$                                                     | b                      | b/a   | c                    | c/a   |               | d                                          | e             | d+e          | (d+e)/n        | f             | g             | f+g          | (f+g)/n        |
| Smear+ (n=393)  | 362                                                             | 359                    | 99.2% | 329                  | 90.9% | 24.6, <0.001  | 326                                        | 31            | 357          | 90.8%          | 33            | 3             | 36           | 9.2%           |
| Smear- (n=2003) | 447                                                             | 427                    | 95.5% | 327                  | 73.2% | 83.0, <0.001  | 307                                        | 1556          | 1863         | 93.0%          | 120           | 20            | 140          | 7.0%           |
| Total(n=2396)   | 809                                                             | 786                    | 97.2% | 656                  | 81.1% | 106.1, <0.001 | 633                                        | 1587          | 2220         | 92.7%          | 153           | 23            | 176          | 7.3%           |

\*contaminated and indeterminate results excluded, specimens for which both MGIT and LJ results available.  
(+) positive test, (-) negative test.  
doi:10.1371/journal.pone.0007129.t002

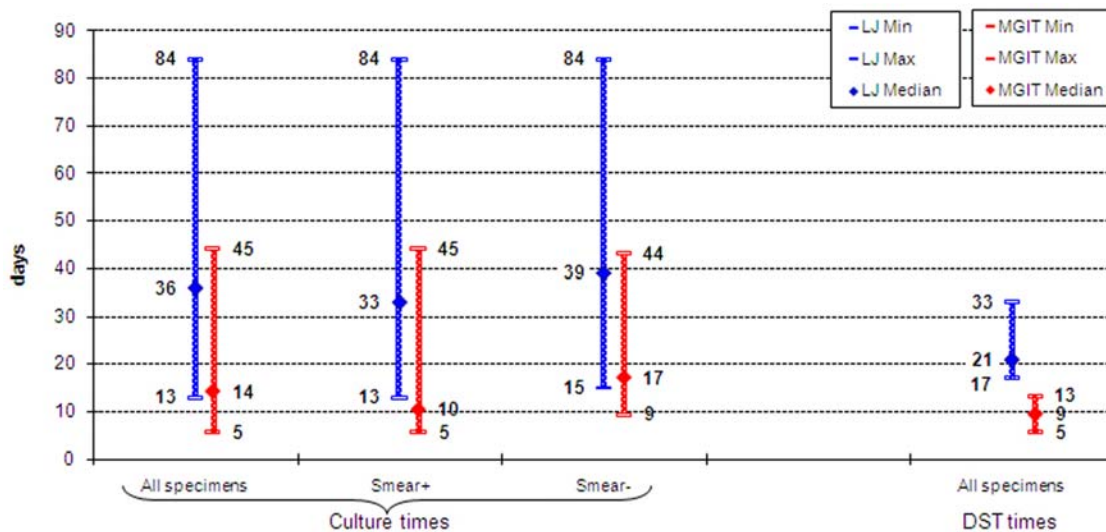

**Figure 2. Time (days) to culture and DST results for mycobacterial cultures.**  
doi:10.1371/journal.pone.0007129.g002

the test was between \$5–6 per specimen (Table 6). The test-strips used for this method were produced at the HPA MRU, London; more detailed assessment of the total assay costs when produced in Russia is needed and is subject of another on-going study.

The costs of the GenoType® MTBDRplus assay were not assessed within this project.

**Discussion**

This study describes the performance characteristics of rapid liquid culture (MGIT 960) and molecular assays for the identification of MTC, rifampin, isoniazid and MDR TB as well as costs of the MGIT 960 system when introduced into Samara, a region within the Russian Federation with high rates of drug resistance and MDR TB [11].

The MGIT 960 method was quickly taken up by the staff and successfully introduced into practice in an escalating manner from primary culture to DST. An initially high contamination rate was

lowered to 3.4% within a month of initiation of the project by meticulous adherence to manufacturer’s instructions, use of standard protocols as well as a well-developed system of rapid sample collection and transport logistics. Coupled with high recovery rates, it demonstrates that decontamination procedure was not overly harsh and permitted adequate growth of mycobacteria while ensuring low contamination rates. A preliminary analysis presented here found that over 96% of positive cultures were *M. tuberculosis* complex, suggesting that frequent NTM isolation (as reported elsewhere [32]) was unlikely to be a significant problem in this study population. This was probably due to the high proportion of smear-positivity and drug resistant TB among enrolled patients, lower HIV-positivity rates compared to African countries, and dominance of the Beijing family TB strains in the area. This strain family has been actively transmitted in the area and has a strong association with drug resistance [5]. Subsequent culture growth was identified using a second commercial rapid identification system and a non-commercial in house system for MTC, isoniazid and rifampin resistance which both employed the same principle of PCR amplification coupled with a reverse phase hybridisation detection system.

As reported in high-resource, low-TB incidence settings, a greater proportion of positive cultures from primary specimens grew in the MGIT system primarily due to increased culture sensitivity for smear-negative specimens.

The median time for culture isolation was significantly faster for the MGIT 960 compared to LJ at 14 days versus 36 days for all specimens in agreement with other international studies mainly from low incidence [32,39–42].

The proportion of drug resistance was very high in the studied population – almost half of the isolates were MDR TB. Mono – resistance to rifampicin was very rarely seen and nearly all rifampin-resistant isolates were MDR TB suggesting that rifampin resistance may serve as a reliable surrogate marker for MDR TB in this population. The median time to obtain DST results from positive cultures was faster with the MGIT system at 9 versus 21 days for LJ based methods in line with previously published works mainly from countries with lower levels of drug resistance [43]. Therefore introduction of the MGIT method can significantly decrease the overall turn-around time to 25 days comparable to data reported elsewhere [44]). However, within

**Table 3. Phenotypic first-line DST comparing LJ and MGIT methodology.\***

|                                           | LJ  |        | MGIT |        |
|-------------------------------------------|-----|--------|------|--------|
|                                           | N   | %      | N    | %      |
| Total Patients with DST results (Inh+Rif) | 319 | 100.0% | 317  | 100.0% |
| Any resistance                            |     |        |      |        |
| Any resistance to isoniazid (Inh)         | 195 | 61.1%  | 201  | 63.4%  |
| Any resistance to rifampin (Rif)          | 158 | 49.5%  | 158  | 49.8%  |
| Any resistance ethambutol (E)             | 81  | 25.4%  | 84   | 26.5%  |
| Any resistance to streptomycin (S)        | 184 | 57.7%  | 192  | 60.6%  |
| Any resistance to pyrazinamide (Z)        |     |        | 33   | 10.4%  |
| Total Multi-Drug Resistance (MDR)         | 156 | 49.8%  | 158  | 49.8%  |
| Total poly-resistance other than MDR      | 36  | 11.3%  | 37   | 11.7%  |
| Total Susceptible                         | 107 | 33.5%  | 104  | 32.6%  |

\*DST was set up one culture per patient; contaminated and undetermined results excluded

doi:10.1371/journal.pone.0007129.t003



**Table 4.** Comparative agreement of LJ and MGIT-based DST methods.

| DST         | No of concordant resistant | Total No resistant any methods | % concordance | No of concordant sensitive | Total No sensitive any methods | % concordance | Total agreement (sensitive and resistant)% |
|-------------|----------------------------|--------------------------------|---------------|----------------------------|--------------------------------|---------------|--------------------------------------------|
| Inh (n-315) | 190                        | 197                            | 96.4%         | 111                        | 118                            | 94.1%         | 95.6%                                      |
| Rif (n-313) | 153                        | 158                            | 96.8%         | 150                        | 155                            | 96.8%         | 96.8%                                      |
| E (n-321)   | 76                         | 89                             | 85.4%         | 219                        | 232                            | 94.4%         | 91.9%                                      |
| S (n-325)   | 176                        | 193                            | 91.2%         | 115                        | 132                            | 87.1%         | 89.5%                                      |

\* for cultures, on which DST results were available from both methods; 11 MGIT and 9 LJ subcultures were contaminated across all four drugs.  
doi:10.1371/journal.pone.0007129.t004

**Table 5.** Comparison of molecular methods with MGIT culture results for isoniazid and rifampin resistance.

|              |     | No concordant R <sup>1</sup> /<br>Total No R by any<br>method (%) | No concordant S <sup>2</sup> /<br>Total No S by any<br>method (%) | Total agree-<br>ment <sup>3</sup> (S & R) % | Sensitivity <sup>4</sup> , % | Specificity <sup>5</sup> , % | Positive predictive<br>value <sup>6</sup> , % | Negative<br>predictive value <sup>7</sup> ,<br>% |
|--------------|-----|-------------------------------------------------------------------|-------------------------------------------------------------------|---------------------------------------------|------------------------------|------------------------------|-----------------------------------------------|--------------------------------------------------|
| MA (n-305)   | Inh | 188/207 (90.8%)                                                   | 97/115 (84.3%)                                                    | 88.5%                                       | 93.5%                        | 93.5%                        | 96.7%                                         | 87.8%                                            |
|              | Rif | 140/177 (79.1%)                                                   | 124/150 (82.7%)                                                   | 80.7%                                       | 87.8%                        | 94.2%                        | 95.0%                                         | 86.2%                                            |
| Hain (n-311) | Inh | 193/214 (90.2%)                                                   | 97/118 (82.2%)                                                    | 87.3%                                       | 93.1%                        | 93.5%                        | 96.6%                                         | 87.0%                                            |
|              | Rif | 148/197 (75.1%)                                                   | 131/161 (81.4%)                                                   | 77.9%                                       | 86.5%                        | 94.4%                        | 95.1%                                         | 84.9%                                            |

**MA-microarray method; Hain - GenoType<sup>®</sup> MTBDRplus method (Hain Lifesciences GmbH, Germany).**

$$\begin{aligned}
 1. \text{ Concordant resistant} &= \frac{R_1 R_2}{R_1 R_2 + S_1 R_2 + S_2 R_1} & 4. \text{ Sensitivity} &= \frac{R_1 R_2}{R_1 R_2 + R_1 S_2} \\
 2. \text{ Concordant sensitive} &= \frac{S_1 S_2}{S_1 S_2 + S_2 R_1 + S_1 R_2} & 5. \text{ Specificity} &= \frac{S_1 S_2}{S_1 S_2 + S_1 R_2} \\
 3. \text{ Total agreement} &= \frac{R_1 R_2 + S_1 S_2}{R_1 R_2 + S_1 S_2 + S_2 R_1 + S_1 R_2} & 6. \text{ Positive predictive value} &= \frac{R_1 R_2}{R_1 R_2 + S_1 R_2} \\
 & & 7. \text{ Negative predictive value} &= \frac{S_1 S_2}{S_1 S_2 + S_2 R_1}
 \end{aligned}$$

Where R-resistant and S-sensitive, 1 – by the test method (Hain or Macroarray), 2 – by the reference method (MGIT).  
doi:10.1371/journal.pone.0007129.t005

**Table 6.** Comparison of molecular methods with LJ culture results for isoniazid and rifampin resistance.

|              |     | No concordant R <sup>1</sup> /<br>Total No R by any<br>method (%) | No concordant S <sup>2</sup> /<br>Total No S by any<br>method (%) | Total agree-<br>ment <sup>3</sup> (S & R) % | Sensitivity <sup>4</sup> , % | Specificity <sup>5</sup> , % | Positive predictive<br>value <sup>6</sup> , % | Negative<br>predictive value <sup>7</sup> ,<br>% |
|--------------|-----|-------------------------------------------------------------------|-------------------------------------------------------------------|---------------------------------------------|------------------------------|------------------------------|-----------------------------------------------|--------------------------------------------------|
| MA (n-305)   | Inh | 195/216 (90.3%)                                                   | 101/122 (82.8%)                                                   | 87.6%                                       | 92.9%                        | 94.4%                        | 97.0%                                         | 87.1%                                            |
|              | Rif | 152/177 (85.9%)                                                   | 129/154 (83.8%)                                                   | 84.9%                                       | 90.5%                        | 93.5%                        | 94.4%                                         | 89.0%                                            |
| Hain (n-311) | Inh | 194/221 (87.8%)                                                   | 99/126 (78.6%)                                                    | 84.4%                                       | 91.1%                        | 92.5%                        | 96.0%                                         | 83.9%                                            |
|              | Rif | 154/185 (83.2%)                                                   | 133/164 (81.1%)                                                   | 82.2%                                       | 88.0%                        | 93.0%                        | 93.9%                                         | 86.4%                                            |

**MA-microarray method; Hain - GenoType<sup>®</sup> MTBDRplus method (Hain Lifesciences GmbH, Germany).**

$$\begin{aligned}
 1. \text{ Concordant resistant} &= \frac{R_1 R_2}{R_1 R_2 + S_1 R_2 + S_2 R_1} & 4. \text{ Sensitivity} &= \frac{R_1 R_2}{R_1 R_2 + R_1 S_2} \\
 2. \text{ Concordant sensitive} &= \frac{S_1 S_2}{S_1 S_2 + S_2 R_1 + S_1 R_2} & 5. \text{ Specificity} &= \frac{S_1 S_2}{S_1 S_2 + S_1 R_2} \\
 3. \text{ Total agreement} &= \frac{R_1 R_2 + S_1 S_2}{R_1 R_2 + S_1 S_2 + S_2 R_1 + S_1 R_2} & 6. \text{ Positive predictive value} &= \frac{R_1 R_2}{R_1 R_2 + S_1 R_2} \\
 & & 7. \text{ Negative predictive value} &= \frac{S_1 S_2}{S_1 S_2 + S_2 R_1}
 \end{aligned}$$

Where R-resistant and S-sensitive, 1 – by the test method (Hain or Macroarray), 2 – by the reference method (LJ).  
doi:10.1371/journal.pone.0007129.t006

**Table 7.** Comparison of overall costs for primary screening, first line DST testing per specimen screened for MGIT, LJ and molecular identification (Macroarray) tests (US dollar).

| Pricing and resource input | Primary culture |          |                    | FLD DST (SIRE) |            |          | FLD DST (IR)      |          |            | Macroarray <sup>≠</sup> |                    |          |
|----------------------------|-----------------|----------|--------------------|----------------|------------|----------|-------------------|----------|------------|-------------------------|--------------------|----------|
|                            | MGIT Int'l      | LJ Int'l | MGIT FIND-BD/Local | LJ Local       | MGIT Int'l | LJ Int'l | MGITFIND-BD/Local | LJ Local | MGIT Int'l | LJ Int'l                | MGIT FIND-BD/Local | LJ Local |
| Decontamination*           | 3.32            | 3.32     | 2.76               | 2.76           | 3.32       | 3.32     | 2.76              | 2.76     | 3.32       | 3.32                    | 2.76               | 2.76     |
| Prep LJ                    | N/A             | 0.22     | N/A                | 0.10           | N/A        | 1.08     | N/A               | 0.49     | –          | 0.65                    | –                  | 0.29     |
| Test                       |                 |          |                    |                |            |          |                   |          |            |                         |                    |          |
| Overhead                   | 1.94            | 4.95     | 1.94               | 4.95           | 3.42       | 7.93     | 3.42              | 7.93     | 1.37       | 5.97                    | 1.37               | 5.97     |
| Building                   | 0.42            | 1.07     | 0.42               | 1.07           | 0.54       | 1.48     | 0.54              | 1.48     | 0.42       | 1.18                    | 0.22               | 1.18     |
| Equipment                  | 1.92            | 0.50     | 1.45               | 0.24           | 4.69       | 2.69     | 2.45              | 1.11     | 2.40       | 1.35                    | 1.21               | 0.66     |
| Staff                      | 0.51            | 1.34     | 0.51               | 1.34           | 1.66       | 2.96     | 1.66              | 2.96     | 0.66       | 2.02                    | 0.66               | 2.02     |
| Medical supplies           | 5.08            | 0.09     | 4.58               | 0.05           | 42.04      | 0.36     | 21.58             | 0.28     | 19.88      | 0.35                    | 10.50              | 0.58     |
| Sub-total Test             | 9.87            | 7.95     | 8.90               | 7.66           | 52.35      | 15.42    | 29.66             | 13.76    | 24.40      | 10.87                   | 13.96              | 10.42    |
| Total                      | 13.74           | 11.49    | 11.66              | 10.50          | 55.68      | 19.83    | 32.42             | 17.00    | 27.73      | 14.84                   | 16.71              | 13.47    |

\*includes specimen transportation costs.

≠ Macroarray steps include all steps from DNA extraction to reading/reporting of the results.

Int'L – international prices.

NA – not applicable.

doi:10.1371/journal.pone.0007129.t007

the project framework the turn-around-time for positive cultures and DST ranged from 13 to 87 days with a median of 38 days for the MGIT. Delays occurred due to logistical problems during the introduction of the MGIT system into routine use (e.g. reagents supply), training of additional personnel, contamination and delays between receiving a culture and subculturing for DST. One of the advantages of using the MGIT system was an opportunity to reliably determine sensitivity to pyrazinamide. This test is not routinely performed on LJ media in Russia due to the lack of standard protocols and variable standardization recommended on the national level. Although the MGIT system generated all FLD DST results more rapidly than the LJ methodology, the molecular methods provided results for isoniazid and rifampin resistance within one day. Another study performed in the same setting of the Samara Regional Tuberculosis Laboratory presented evidence for efficient use of molecular assays (GenoType® MTBDRplus) directly on smear-positive sputum samples [45]. The current study demonstrated that concordance of the commercial and in-house molecular methods for isoniazid and rifampin resistance was high, with very close but not complete agreement for isoniazid and rifampin resistance between the molecular and MGIT defined DST results. These methods could be implemented as an initial screen for MDR TB (directly on smear-positive samples or on mycobacterial cultures isolated from smear-negative samples), permitting the institution of infection control measures at an earlier stage, as well as more rapid provision of appropriate treatment in line with recent WHO recommendations that were developed with the support of the Samara project data [26]. The presence of mutations indicating resistance could be used as an indicator for simultaneously initiating first- and second-line resistance testing in MGIT, which could significantly reduce the delay in administering an appropriate drug regimen to an MDR TB (or XDR TB) case.

The economic analysis demonstrated that although the MGIT culture system was slightly more expensive than the LJ method (\$12 versus \$11 respectively), it would permit earlier diagnosis of TB and prompt treatment initiation (a reduction in median culture time of 22 days).

Similarly MGIT FLD DST was more expensive than LJ FLD DST (\$56 versus \$20 using international prices) but the difference allowed a significant decrease in diagnostic turn-around time resulting in earlier identification of drug resistance, including MDR TB, especially when FLD and SLD DST are set up simultaneously for isolates which were diagnosed as having mutations to rifampicin and isoniazid by molecular methods. Coupled with molecular systems for rapid identification and drug resistance detection, this would have a significant impact on a timely administration of an adequate treatment regimen and potentially improve treatment outcomes. Administration of timely therapy will render an individual non-infectious and interrupt transmission; molecular methods and/or MGIT based DST identify the many patients who have MDR TB (who will not be rendered non-infectious by standard TB therapy and so will continue to transmit MDR TB) and culture-based phenotypic methods are the only way of reliably identifying the antimicrobials that are able to render MDR TB individuals non-infectious.

This demonstration project provided much of the evidence underpinning the diagnostic policy changes relating to bacteriological culture adopted by the WHO in 2007-8. Currently WHO recommend the routine use of TB liquid culture and DST even in resource-limited settings to improve diagnosis of TB in general, MDR TB and smear-negative pulmonary TB including applica-

tion of a rapid method of species identification [27]. The higher cost of the automated liquid culture media systems is currently being addressed by the manufacturers by introducing changes into the pricing policy for the public sector in lower income countries. This project showed that it is possible to successfully introduce this technology into resource-constrained settings but that to achieve satisfactory implementation and performance of the MGIT system (which is more prone to bacterial contamination due to the greater sensitivity of liquid media for culture of mycobacteria as well as other microorganisms compared with solid culture and for DST which is more complex to perform than using solid culture) key issues needed to be resolved. These include: (1) availability of appropriate Category 3 level laboratory infrastructure including an agreed maintenance plan for the BACTEC system; (2) repetitive on-site training of laboratory personnel in MGIT methodology (using detailed SOPs and the system manual) and molecular methods to create a multi-skilled cadre of staff; (3) initial expert observation of the performance and implementation of internal and external quality control of laboratory work; (4) development of effective logistics for timely collection, storage and transport of fresh sputum samples to the laboratory as well as the reporting of results; (5) the creation of algorithms for laboratory work flow and computerized laboratory record keeping; (6) timely maintenance of equipment and ensuring a safe continuous supply of reagents by establishing a commercial contract with a manufacturer and (7) introduction of a robust stock control system.

For these diagnostic culture systems to have a maximum therapeutic impact there must be rapid identification of cultures with the ability to analyse first and second-line DST phenotypically when molecular tests demonstrate the presence of mutations encoding rifampin (and possibly isoniazid) resistance in the original patient specimen or the resulting culture. This will significantly reduce the time between sputum collection and full susceptibility testing for MDR TB cases. Addressing timeliness in technological improvement should go in tandem with minimizing organizational delay. Clinicians need to make prompt therapeutic changes following rapid DST analysis.

With effective planning and logistics, an adequate decontamination protocol and careful training, the MGIT 960 and molecular-based methodologies can be successfully introduced into a reference laboratory setting in a middle TB incidence country. The high rates of MDR TB in the Russian Federation make the introduction of such assays particularly useful and are likely to translate to other settings with a high level of drug resistance or where the additional speed of diagnosis and increased diagnostic sensitivity are of value as in HIV associated tuberculosis.

## Acknowledgments

The project was a close collaboration between the Samara TB service, the UK Health Protection Agency and Barts and the London Medical School, University of London, Hain Lifescience GmbH and the Foundation for Innovative New Diagnostics (FIND).

**We would like to thank Dr Olga Kurkina for help with participants' recruitment, Mrs Marina Korobova for performing a proportion of bacteriological work, Ms Olga Ignat'yeva and Ms Svetlana Mironova for performing molecular work on a proportion of isolates.**

## Author Contributions

Conceived and designed the experiments: YB FD VN AK NM SZ NL HLA RO HS IF. Performed the experiments: YB FD VN AK NM TS NI SZ NL HLA HS. Analyzed the data: YB FD VN TS RO HS AS. Contributed reagents/materials/analysis tools: YB VN AK NM HLA RO HS IF. Wrote the paper: YB FD HLA RO.



## References

- Migliori GB, Lange C, Girardi E, Centis R, Besozzi G, et al. (2008) Extensively drug-resistant tuberculosis is worse than multidrug-resistant tuberculosis: different methodology and settings, same results. *Clin Infect Dis* 46: 958–959.
- Dewan P, Sosnovskaja A, Thomsen V, Cicenaitis J, Laserson K, et al. (2005) High prevalence of drug-resistant tuberculosis, Republic of Lithuania, 2002. *Int J Tuberc Lung Dis* 9: 170–174.
- Leimane V, Riekstina V, Holtz TH, Zarovska E, Skripconoka V, et al. (2005) Clinical outcome of individualised treatment of multidrug-resistant tuberculosis in Latvia: a retrospective cohort study. *Lancet* 365: 318–326.
- Skenders G, Fry AM, Prokopovica I, Greckoseja S, Broka L, et al. (2005) Multidrug-resistant tuberculosis detection, Latvia. *Emerg Infect Dis* 11: 1461–1463.
- Drobniewski F, Balabanova Y, Nikolayevskiy V, Ruddy M, Kuznetsov S, et al. (2005) Drug-resistant tuberculosis, clinical virulence, and the dominance of the Beijing strain family in Russia. *Jama* 293: 2726–2731.
- Toungoussova OS, Sandven P, Mariandyshv AO, Nizovtseva NI, Bjune G, et al. (2002) Spread of drug-resistant Mycobacterium tuberculosis strains of the Beijing genotype in the Archangel Oblast, Russia. *J Clin Microbiol* 40: 1930–1937.
- Ruddy M, Balabanova Y, Graham C, Fedorin I, Malomanova N, et al. (2005) Rates of drug resistance and risk factor analysis in civilian and prison patients with tuberculosis in Samara Region, Russia. *Thorax* 60: 130–135.
- Kubica T, Agzamova R, Wright A, Aziz MA, Rakishev G, et al. (2005) The Beijing genotype is a major cause of drug-resistant tuberculosis in Kazakhstan. *Int J Tuberc Lung Dis* 9: 646–653.
- Balabanova Y, Drobniewski F, Fedorin I, Zakharova S, Nikolayevskiy V, et al. (2006) The Directly Observed Therapy Short-Course (DOTS) strategy in Samara Oblast, Russian Federation. *Respir Res* 7: 44.
- Coninx R, Pfyffer GE, Mathieu C, Savina D, Debacker M, et al. (1998) Drug resistant tuberculosis in prisons in Azerbaijan: case study. *BMJ* 316: 1423–1425.
- World Health Organization/International Union Against Tuberculosis and Lung Diseases (2008) Global project on anti-tuberculosis drug surveillance in the world. Report no.4.WHO/HTM/TB/2008.394.Geneva.
- Bergmann JS, Fish G, Woods GL (2000) Evaluation of the BBL MGIT (Mycobacterial growth indicator tube) AST SIRE system for antimycobacterial susceptibility testing of Mycobacterium tuberculosis to 4 primary antituberculous drugs. *Arch Pathol Lab Med* 124: 82–86.
- Goloubeva V, Lecocq M, Lassovsky P, Matthys F, Portaels F, et al. (2001) Evaluation of mycobacteria growth indicator tube for direct and indirect drug susceptibility testing of Mycobacterium tuberculosis from respiratory specimens in a Siberian prison hospital. *J Clin Microbiol* 39: 1501–1505.
- Tortoli E, Benedetti M, Fontanelli A, Simonetti MT (2002) Evaluation of automated BACTEC MGIT 960 system for testing susceptibility of Mycobacterium tuberculosis to four major antituberculous drugs: comparison with the radiometric BACTEC 460TB method and the agar plate method of proportion. *J Clin Microbiol* 40: 607–610.
- Bemer P, Palicova F, Rusch-Gerdes S, Drugeon HB, Pfyffer GE (2002) Multicenter evaluation of fully automated BACTEC Mycobacteria Growth Indicator Tube 960 system for susceptibility testing of Mycobacterium tuberculosis. *J Clin Microbiol* 40: 150–154.
- Rusch-Gerdes S, Domehl C, Nardi G, Gismondo MR, Welscher HM, et al. (1999) Multicenter evaluation of the mycobacteria growth indicator tube for testing susceptibility of Mycobacterium tuberculosis to first-line drugs. *J Clin Microbiol* 37: 45–48.
- Somoskovi A, Song Q, Mester J, Tanner C, Hale YM, et al. (2003) Use of molecular methods to identify the Mycobacterium tuberculosis complex (MTBC) and other mycobacterial species and to detect rifampin resistance in MTBC isolates following growth detection with the BACTEC MGIT 960 system. *J Clin Microbiol* 41: 2822–2826.
- Bardarov S, Jr., Dou H, Eisenach K, Banaiee N, Ya S, et al. (2003) Detection and drug-susceptibility testing of M. tuberculosis from sputum samples using luciferase reporter phage: comparison with the Mycobacteria Growth Indicator Tube (MGIT) system. *Diagn Microbiol Infect Dis* 45: 53–61.
- Mokrousov I, Bhanu NV, Suffys PN, Kadival GV, Yap SF, et al. (2004) Multicenter evaluation of reverse line blot assay for detection of drug resistance in Mycobacterium tuberculosis clinical isolates. *J Microbiol Methods* 57: 323–335.
- Drobniewski FA, Hoffner S, Rusch-Gerdes S, Skenders G, Thomsen V (2006) Recommended standards for modern tuberculosis laboratory services in Europe. *Eur Respir J*.
- Watterson SA, Wilson SM, Yates MD, Drobniewski FA (1998) Comparison of three molecular assays for rapid detection of rifampin resistance in Mycobacterium tuberculosis. *J Clin Microbiol* 36: 1969–1973.
- Drobniewski FA, Watterson SA, Wilson SM, Harris GS (2000) A clinical, microbiological and economic analysis of a national service for the rapid molecular diagnosis of tuberculosis and rifampicin resistance in Mycobacterium tuberculosis. *J Med Microbiol* 49: 271–278.
- Seagar AL, Prendergast C, Emmanuel FX, Rayner A, Thomson S, et al. (2008) Evaluation of the GenoType Mycobacteria Direct assay for the simultaneous detection of the Mycobacterium tuberculosis complex and four atypical mycobacterial species in smear-positive respiratory specimens. *J Med Microbiol* 57: 605–611.
- Somoskovi A, Dormandy J, Mitsani D, Rivenburg J, Salfinger M (2006) Use of smear-positive samples to assess the PCR-based genotype MTBDR assay for rapid, direct detection of the Mycobacterium tuberculosis complex as well as its resistance to isoniazid and rifampin. *J Clin Microbiol* 44: 4459–4463.
- Hillemann D, Rusch-Gerdes S, Richter E (2007) Evaluation of the GenoType MTBDRplus assay for rifampin and isoniazid susceptibility testing of Mycobacterium tuberculosis strains and clinical specimens. *J Clin Microbiol* 45: 2635–2640.
- World Health Organization (2008) Molecular line probe assays for rapid screening of patients at risk of multi-drug resistance (MDR) tuberculosis.
- World Health Organization (2008) The use of liquid medium for culture and DST. New WHO Policies.
- Drobniewski F, Balabanova Y, Ruddy M, Weldon L, Jeltkova K, et al. (2002) Rifampin- and multidrug-resistant tuberculosis in Russian civilians and prison inmates: dominance of the Beijing strain family. *Emerg Infect Dis* 8: 1320–1326.
- Laszlo A, Rahman M, Espinal M, Raviglione M (2002) Quality assurance programme for drug susceptibility testing of Mycobacterium tuberculosis in the WHO/IUATLD Supranational Reference Laboratory Network: five rounds of proficiency testing, 1994–1998. *Int J Tuberc Lung Dis* 6: 748–756.
- Kent PT, Kubica GP, eds (1985) Public health mycobacteriology: a guide for the level III laboratory. Atlanta: US Department of Health and Human Services.
- Prikaz of the Ministry of Health of the Russian Federation # 109 from 21 March 2003 “On improvement of TB control activities in the Russian Federation”.
- Hillemann D, Richter E, Rusch-Gerdes S (2006) Use of the BACTEC Mycobacteria Growth Indicator Tube 960 automated system for recovery of Mycobacteria from 9,558 extrapulmonary specimens, including urine samples. *J Clin Microbiol* 44: 4014–4017.
- Krauner A, Yates M, Drobniewski F (2006) Critical concentration setting and evaluation of MGIT 960 antimicrobial susceptibility testing to first- and second line antimicrobial drugs with clinical drug resistant strains of *Mycobacterium tuberculosis*. *J Clin Microbiol* 44: 811–818.
- Nikolayevskiy V, Brown T, Balabanova Y, Ruddy M, Fedorin I, et al. (2004) Detection of mutations associated with isoniazid and rifampin resistance in Mycobacterium tuberculosis isolates from Samara Region, Russian Federation. *J Clin Microbiol* 42: 4498–4502.
- Drummond MF, O'Brien B, Stoddart GL, Torrance GW (1997) Methods for the Economic Evaluation of Health Care Programmes. Second Edition. Oxford: Oxford University Press.
- Baltussen R, Floyd K, Dye C (2005) Cost effectiveness analysis of strategies for tuberculosis control in developing countries. *Bmj* 331: 1364.
- Tan-Torres Edejer T, Baltussen R, Adam T, Hutubessy R, Acharya A, et al. (2003) Making Choices in Health: WHO Guide to Cost-effectiveness Analysis. Geneva: World Health Organisation.
- Drobniewski FA, Caws M, Gibson A, Young D (2003) Modern laboratory diagnosis of tuberculosis. *Lancet Infect Dis* 3: 141–147.
- Srisuwanvilai LO, Monkongdee P, Podewils LJ, Ngamlert K, Pobkeeree V, et al. (2008) Performance of the BACTEC MGIT 960 compared with solid media for detection of Mycobacterium in Bangkok, Thailand. *Diagn Microbiol Infect Dis* 61: 402–407.
- Hanna BA, Ebrahimzadeh A, Elliott LB, Morgan MA, Novak SM, et al. (1999) Multicenter evaluation of the BACTEC MGIT 960 system for recovery of mycobacteria. *J Clin Microbiol* 37: 748–752.
- Pfyffer GE, Welscher HM, Kissling P, Cieslak C, Casal MJ, et al. (1997) Comparison of the Mycobacteria Growth Indicator Tube (MGIT) with radiometric and solid culture for recovery of acid-fast bacilli. *J Clin Microbiol* 35: 364–368.
- Chien HP, Yu MC, Wu MH, Lin TP, Luh KT (2000) Comparison of the BACTEC MGIT 960 with Lowenstein-Jensen medium for recovery of mycobacteria from clinical specimens. *Int J Tuberc Lung Dis* 4: 866–870.
- Giampaglia CM, Martins MC, Vieira GB, Vinhas SA, Telles MA, et al. (2007) Multicenter evaluation of an automated BACTEC 960 system for susceptibility testing of Mycobacterium tuberculosis. *Int J Tuberc Lung Dis* 11: 986–991.
- Somoskovi A, Clobridge A, Larsen SC, Sinyavskiy O, Surucuoglu S, et al. (2006) Does the MGIT 960 system improve the turnaround times for growth detection and susceptibility testing of the Mycobacterium tuberculosis complex? *J Clin Microbiol* 44: 2314–2315.
- Nikolayevskiy V, Balabanova Y, Simak T, Malomanova N, Fedorin I, et al. (2009) Performance of the GenoType(R) MTBDRPlus assay in the diagnosis of tuberculosis and drug resistance in Samara, Russian Federation. *BMC Clin Pathol* 9: 2.
